# Supplementary material
Source: PubMed Central journal article supplement (PMC4686847)
Supplement: supp_dc15-1254v151254_DC151254SupplementaryData.pdf [file supp_dc15-1254v151254_DC151254SupplementaryData.pdf]

## SUPPLEMENTARY DATA

### METHODS

#### Power and sample size.

At the planning stage of this study, we expected a total sample size of 2,432 women diagnosed with GDM in a given year at the 44 facilities, and that approximately 76% would have weight measured at/near 12 months postpartum, given preliminary pilot data. Given the group-randomization study design, calculation of minimum detectable treatment effects accounted for the expected intra-class correlation (ICC, correlation of observations within medical center) for the outcomes of interest. The intraclass correlation in patient-level outcomes of interest within center was expected to be quite small. Published estimates of within practice intraclass correlation coefficients for patient outcomes are generally less than 0.05 and are often between .01 and .02<sup>1-4</sup>. We therefore calculated minimum detectable effects across a reasonable range for the expected intra-class correlation (.01 - .05), using the method of Donner and Klar<sup>5</sup>. These calculations assumed an equal number of patients per cluster, which is almost always a reasonable approach for approximation in power/sample size calculations for cluster randomized study designs<sup>6</sup>. At the planning stage, minimum detectable differences in the proportion meeting weight goals ranged from 0.060 to 0.10, across the range in expected proportion meeting goal in the usual care condition (0.15 - 0.25) and across the range in expected ICC (0.01 - 0.05) [ $\alpha=.05$ , power=.80]. In addition, minimum detectable differences in mean weight change ranged from 0.80kg – 1.15kg across the range in assumed ICC (expected standard deviation from preliminary data).

#### Observed Intraclass Correlations

The observed ICCs for the primary study outcome of pregravid to postpartum weight change were .002, .003, and .001 at 6 weeks, 6 months, and 12 months, respectively. The ICCs for meeting the postpartum weight goal were .015 and .017 at 6 months and 12 months, respectively.

#### Postpartum screening and diagnosis of pre-diabetes and diabetes

Fasting plasma glucose, plasma glucose levels measured 2-hours after a 75-gram oral glucose tolerance test, and A1c tests were used to define screening and diagnosis of pre-diabetes or diabetes from 2 weeks postpartum to the end of follow-up. Women were diagnosed to have pre-diabetes or diabetes according to the thresholds recommended by the American Diabetes Association.<sup>7</sup> Although, the use A1c testing during the first 3 months postpartum may underestimate the presence of disglycemia due to possible reticulocytosis after delivery, which would tend to lower the A1c relative to the true level of glycemia, only 40 (3.8%) women in the intervention and 53 (4.6%) women in usual care were tested by A1c only between 2-weeks and 12-weeks postpartum. Therefore, if any bias would have been introduced with the use of A1c testing, it would be conservative since more women in usual care than in intervention were tested by A1c between 2- weeks and 12-weeks postpartum. Among these women, 13 (32.5%) in the intervention and 18 (34.0%) in usual care had A1c values diagnostic of pre-diabetes.

SUPPLEMENTARY DATA

**Supplementary Table S1.** Proportion of women meeting the postpartum weight goals with odds ratios estimating differences between conditions: the Gestational Diabetes' Effects on Moms trial

|                                      | Measured postpartum weights |      |            |      |                     |             | Measured and self-reported postpartum weights |      |            |      |                     |             | Measured and imputed postpartum weights |             |
|--------------------------------------|-----------------------------|------|------------|------|---------------------|-------------|-----------------------------------------------|------|------------|------|---------------------|-------------|-----------------------------------------|-------------|
|                                      | Intervention                |      | Usual care |      | OR<br>(95% CI)      | P<br>value* | Intervention                                  |      | Usual care |      | OR<br>(95% CI)      | P<br>value* | OR<br>(95% CI)                          | P<br>value* |
|                                      | N                           | %    | N          | %    |                     |             | N                                             | %    | N          | %    |                     |             |                                         |             |
| <b>Among women with BMI &lt;25.0</b> |                             |      |            |      |                     |             |                                               |      |            |      |                     |             |                                         |             |
| Average effect of intervention       | 370                         |      | 394        |      | 1.35<br>(1.03-1.78) | 0.03        |                                               |      |            |      | 1.37<br>(1.06-1.76) | 0.02        | 1.32<br>(1.03-1.69)                     | 0.03        |
| 6-weeks postpartum                   | 352                         | 25.3 | 377        | 20.2 | 1.27<br>(0.98-1.64) | 0.07        | 371                                           | 25.3 | 388        | 20.6 | 1.31<br>(1.04-1.64) | 0.02        | 1.29<br>(0.92-1.81)                     | 0.13        |
| 6-months postpartum                  | 266                         | 45.9 | 299        | 34.1 | 1.54<br>(1.05-2.27) | 0.03        | 328                                           | 45.4 | 349        | 34.7 | 1.51<br>(1.08-2.10) | 0.02        | 1.41<br>(1.00-1.98)                     | 0.05        |
| 12-months postpartum                 | 230                         | 51.7 | 259        | 42.9 | 1.25<br>(0.85-1.84) | 0.26        | 317                                           | 50.2 | 320        | 43.8 | 1.28<br>(0.91-1.80) | 0.15        | 1.25<br>(0.81-1.92)                     | 0.30        |
| <b>Among women with BMI ≥25.0</b>    |                             |      |            |      |                     |             |                                               |      |            |      |                     |             |                                         |             |
| Average effect of intervention       | 681                         |      | 776        |      | 1.21<br>(1.01-1.45) | 0.04        |                                               |      |            |      | 1.11<br>(0.95-1.30) | 0.19        | 1.19<br>(1.02-1.38)                     | 0.03        |
| 6-weeks postpartum                   | 648                         | 25.6 | 752        | 23.5 | 1.11<br>(0.91-1.36) | 0.29        | 679                                           | 24.9 | 768        | 23.7 | 1.08<br>(0.89-1.31) | 0.43        | 1.12<br>(0.88-1.43)                     | 0.34        |
| 6-months postpartum                  | 498                         | 22.5 | 576        | 18.6 | 1.35<br>(1.03-1.76) | 0.03        | 594                                           | 23.9 | 696        | 20.7 | 1.24<br>(1.00-1.54) | 0.05        | 1.25<br>(0.95-1.63)                     | 0.11        |
| 12-months postpartum                 | 446                         | 23.3 | 485        | 20.0 | 1.25<br>(0.86-1.82) | 0.24        | 573                                           | 24.3 | 647        | 23.5 | 1.03<br>(0.80-1.33) | 0.79        | 1.21<br>(0.91-1.61)                     | 0.18        |

P value for treatment x follow-up time point interaction > 0.05

P value for treatment x pregravid BMI interaction = 0.48 for meeting the goals

SUPPLEMENTARY DATA

**Supplementary Table S2.** Mean changes in weight from pregravid to postpartum with mean differences between conditions: the Gestational Diabetes' Effects on Moms trial

|                                    | Measured postpartum weights |              |            |              |                          |           | Measured and self-reported postpartum weights |              |            |              |                          |           | Measured and imputed postpartum weights |           |
|------------------------------------|-----------------------------|--------------|------------|--------------|--------------------------|-----------|-----------------------------------------------|--------------|------------|--------------|--------------------------|-----------|-----------------------------------------|-----------|
|                                    | Intervention                |              | Usual care |              | Mean difference (95% CI) | P value * | Intervention                                  |              | Usual care |              | Mean difference (95% CI) | P value * | Mean difference (95% CI)                | P value * |
| N                                  | Mean (SD)                   | N            | Mean (SD)  | N            |                          |           | Mean (SD)                                     | N            | Mean (SD)  | N            |                          |           |                                         |           |
| Average effect of intervention     | 370                         |              | 394        |              | -0.28 (-0.84 to 0.29)    | 0.34      |                                               |              |            |              | -0.28 (-0.83 to 0.26)    | 0.31      | -0.20 (-0.91 to 0.50)                   | 0.58      |
| 6-weeks postpartum                 | 352                         | 3.03 (4.46)  | 377        | 3.37 (4.06)  | -0.31 (-0.92 to 0.30)    | 0.32      | 371                                           | 2.99 (4.41)  | 388        | 3.32 (4.04)  | -0.33 (-0.93 to 0.27)    | 0.28      | -0.24 (-0.94 to 0.47)                   | 0.51      |
| 6-months postpartum                | 266                         | 1.28 (5.01)  | 299        | 1.67 (4.03)  | -0.23 (-0.90 to 0.45)    | 0.51      | 328                                           | 1.14 (4.87)  | 349        | 1.66 (4.01)  | -0.36 (-0.99 to 0.28)    | 0.27      | -0.25 (-1.05 to 0.54)                   | 0.54      |
| 12-months postpartum               | 230                         | 0.55 (4.49)  | 259        | 0.96 (4.28)  | -0.23 (-0.95 to 0.49)    | 0.53      | 317                                           | 0.65 (4.73)  | 320        | 0.79 (4.31)  | -0.21 (-0.88 to 0.46)    | 0.54      | -0.13 (-1.22 to 0.95)                   | 0.81      |
| <b>Among women with BMI ≥ 25.0</b> |                             |              |            |              |                          |           |                                               |              |            |              |                          |           |                                         |           |
| Average effect of intervention     | 681                         |              | 776        |              | -0.30 (-0.83 to 0.23)    | 0.26      |                                               |              |            |              | -0.24 (-0.76 to 0.28)    | 0.37      | -0.24 (-0.76 to 0.29)                   | 0.38      |
| 6-weeks postpartum                 | 648                         | -0.66 (5.68) | 752        | -0.58 (5.60) | -0.18 (-0.75 to 0.39)    | 0.54      | 679                                           | -0.64 (5.65) | 768        | -0.60 (5.58) | -0.17 (-0.73 to 0.39)    | 0.55      | -0.17 (-0.74 to 0.40)                   | 0.55      |
| 6-months postpartum                | 498                         | -0.08 (5.77) | 576        | 0.56 (6.05)  | -0.85 (-1.50 to -0.20)   | 0.01      | 594                                           | -0.37 (5.69) | 696        | 0.13 (6.10)  | -0.62 (-1.30 to 0.00)    | 0.05      | -0.59 (-1.22 to 0.03)                   | 0.06      |
| 12-months postpartum               | 446                         | 0.02 (6.43)  | 485        | 0.25 (5.95)  | -0.53 (-1.25 to 0.19)    | 0.15      | 573                                           | -0.34 (6.31) | 647        | -0.16 (6.30) | -0.32 (-1.00 to 0.37)    | 0.36      | -0.40 (-1.12 to 0.33)                   | 0.28      |

\* *P* value for condition differences

P value for treatment x follow-up time point interaction <0.05 for weight change among women with pregravid BMI ≥25.0 only

P value for treatment x pregravid BMI interaction = 0.93 for weight change

SUPPLEMENTARY DATA

**Supplementary Table S3.** Proportion of women with postpartum hypertension or depression with odds ratios estimating differences between conditions: the Gestational Diabetes' Effects on Moms trial

|                                | Intervention |      | Usual care |      | OR<br>(95% CI)      | p<br>value* | Intervention |      | Usual care |      | OR<br>(95% CI)       | p<br>value* |
|--------------------------------|--------------|------|------------|------|---------------------|-------------|--------------|------|------------|------|----------------------|-------------|
|                                | N            | %    | N          | %    |                     |             | N            | %    | N          | %    |                      |             |
| <b>Hypertension</b>            |              |      |            |      |                     |             |              |      |            |      |                      |             |
| Average effect of intervention | 1050         |      | 1169       |      | 1.02<br>(0.76-1.37) | 0.90        | 1087         |      | 1192       |      | 1.00<br>(0.82- 1.23) | 0.98        |
| 6 weeks postpartum             | 996          | 12.4 | 1122       | 12.6 | 0.90<br>(0.63-1.27) | 0.54        | 1087         | 12.5 | 1192       | 12.7 | 0.93<br>(0.71- 1.23) | 0.62        |
| 6 months postpartum            | 772          | 9.5  | 885        | 8.6  | 1.15<br>(0.80-1.67) | 0.44        | 1083         | 9.3  | 1187       | 8.8  | 1.05<br>(0.74- 1.49) | 0.77        |
| 12 months postpartum           | 693          | 9.7  | 757        | 8.3  | 1.22<br>(0.78-1.90) | 0.38        | 1040         | 9.7  | 1154       | 8.9  | 1.07<br>(0.71- 1.61) | 0.73        |
| <b>Depression</b>              |              |      |            |      |                     |             |              |      |            |      |                      |             |
| Average effect of intervention | 967          |      | 1039       |      | 1.16<br>(0.87-1.54) | 0.32        | 1087         |      | 1192       |      | 0.97<br>(0.79- 1.20) | 0.80        |
| 6 weeks postpartum             | 943          | 10.5 | 1013       | 10.5 | 1.14<br>(0.80-1.63) | 0.48        | 1087         | 8.6  | 1192       | 9.2  | 0.97<br>(0.69- 1.36) | 0.84        |
| 6 months postpartum            | 760          | 13.3 | 827        | 12.2 | 1.19<br>(0.83-1.70) | 0.34        | 1083         | 8.2  | 1187       | 8.8  | 0.93<br>(0.66- 1.32) | 0.68        |
| 12 months postpartum           | 742          | 13.1 | 806        | 12.3 | 1.14<br>(0.79-1.63) | 0.48        | 1040         | 7.8  | 1154       | 7.8  | 1.03<br>(0.71- 1.51) | 0.86        |

Hypertension= systolic blood pressure  $\geq$  140 mmHg or diastolic blood pressure  $\geq$  90 mmHg, or use of antihypertensive medications from electronic medical record

Depression= diagnosis of depression, use of antidepressant medications or depression score  $\geq$ 10 on PHQ-9 from electronic medical record or score  $\geq$ 10 on PHQ-8 from surveys

**Supplementary Figure S2.** Cumulative incidence of pre-diabetes/diabetes: the Gestational Diabetes' Effects on Moms trial

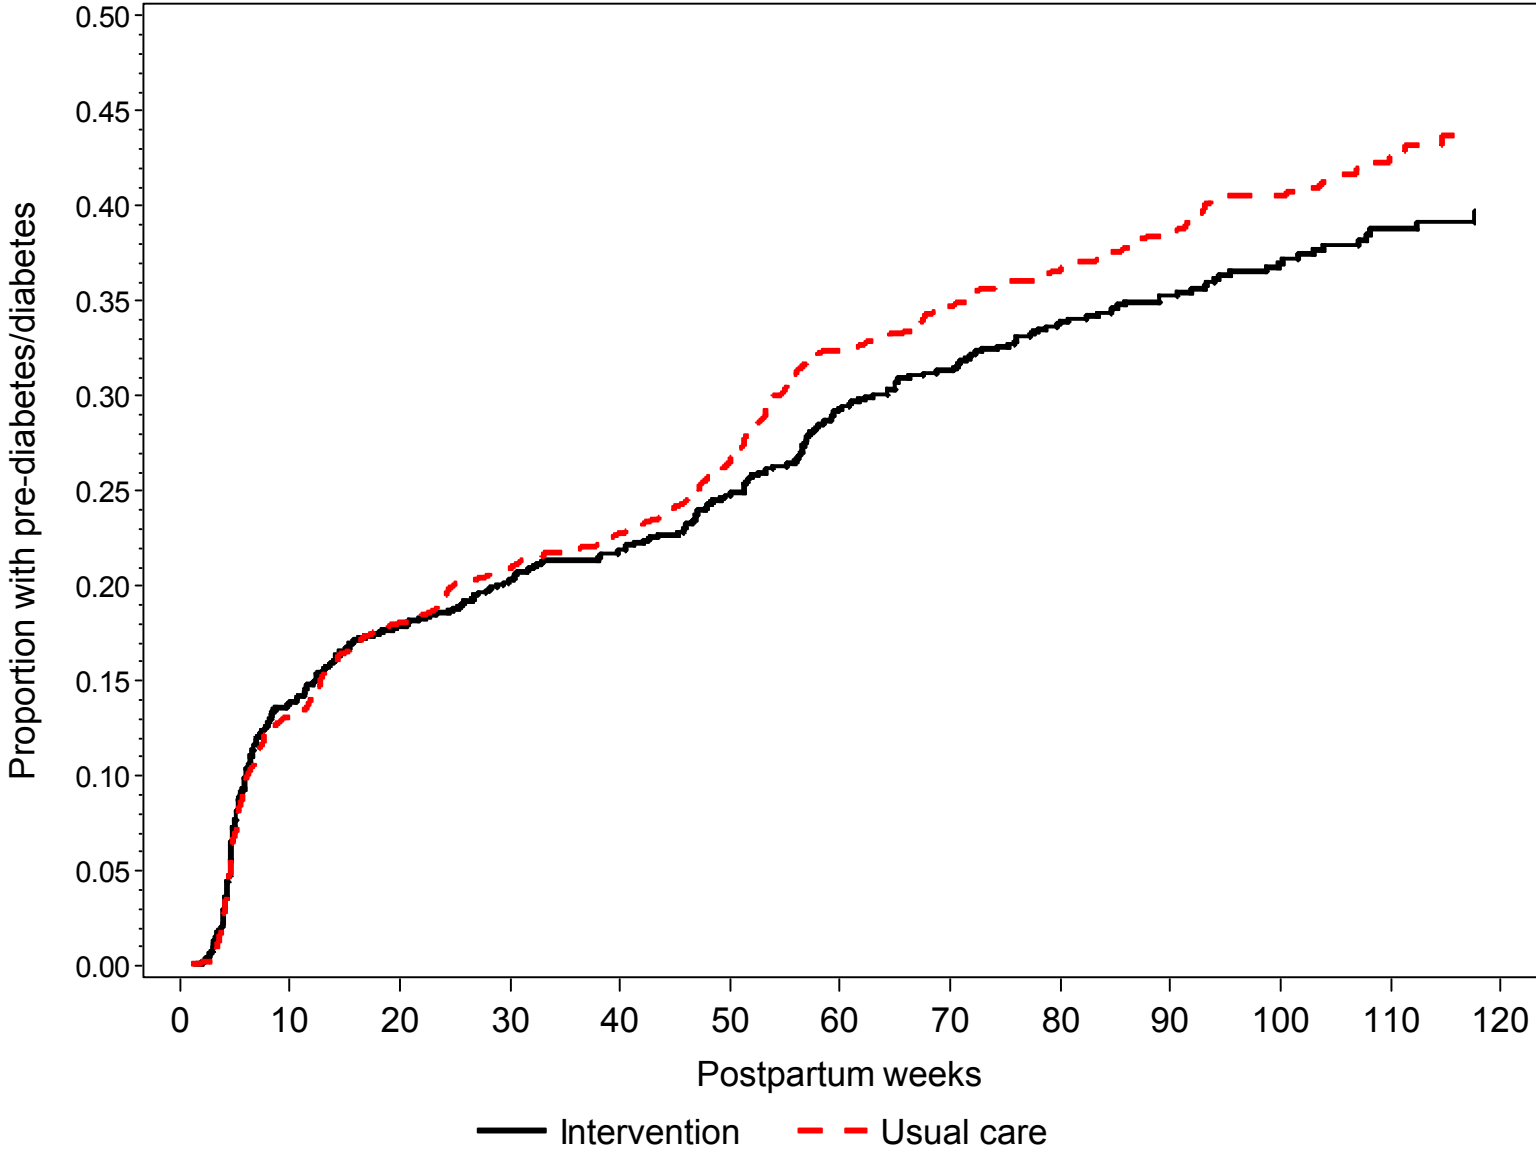

## SUPPLEMENTARY DATA

### References

1. Adams G, Gulliford MC, Ukoumunne OC, Eldridge S, Chinn S, Campbell MJ. Patterns of intra-cluster correlation from primary care research to inform study design and analysis. *J Clin Epidemiol* 2004;57(8):785-794.
2. Littenberg B, MacLean CD. Intra-cluster correlation coefficients in adults with diabetes in primary care practices: the Vermont Diabetes Information System field survey. *BMC Med Res Methodol* 2006;6:20.
3. Parker DR, Evangelou E, Eaton CB. Intraclass correlation coefficients for cluster randomized trials in primary care: the cholesterol education and research trial (CEART). *Contemp Clin Trials* 2005;26(2):260-267.
4. Smeeth L, Ng ES. Intraclass correlation coefficients for cluster randomized trials in primary care: data from the MRC Trial of the Assessment and Management of Older People in the Community. *Control Clin Trials* 2002;23(4):409-421.
5. Donner A, Klar N. Design and Analysis of Cluster Randomization Trials in Health Research. New York: Oxford University Press Inc.; 2000.
6. Leyland A, Goldstein H. Multilevel Modeling of Health Statistics. Chichester: John Wiley & Sons Ltd; 2001.
7. Classification and Diagnosis of Diabetes. *Diabetes Care* 2015;38 (Supplement 1):S8-S16.
